# Supplementary material for: Tonicity-induced cargo loading into extracellular vesicles
Source: Royal Society of Chemistry journal article supplement (doi:10.1039/d3lc00830d), 2024-01-01
Supplement: d3lc00830d1.pdf [file d3lc00830d1.pdf]

# Supporting Information

1

2

3

4 Tonicity-induced Cargo Loading into Extracellular

5 Vesicles

6 Chaeun Lee<sup>a,b†</sup>, Sumit Kumar<sup>a,b†</sup>, Juhee Park<sup>b</sup>, Yongjun Choi<sup>b</sup>, Elizabeth Maria<sup>a,b</sup>, and Yoon-

7 Kyoung Cho<sup>a,b\*</sup>

8

9 <sup>a</sup>Department of Biomedical Engineering, Ulsan National Institute of Science and Technology

10 (UNIST), Ulsan 44919, Korea.

11 <sup>b</sup>Center for Soft and Living Matter, Institute for Basic Science (IBS), Ulsan 44919, Korea.

12 †These authors contributed equally to this work.

13

14 \* E-mail: [ykcho@unist.ac.kr](mailto:ykcho@unist.ac.kr)

## 16 Supplementary Discussion

### 17 Estimation of cargo loading into EVs by hypo-osmotic shock

18 To understand the cargo loading mechanism by hypo-osmotic shock, we employed the  
19 Kedem-Katchalsky (K-K) formalism. The model system is illustrated in **Figure S1** and the following  
20 two equations derived from the K-K formalism are utilized to calculate the relative volume  
21 increment and cargo concentration inside EVs.<sup>1, 2</sup>

$$22 \quad \frac{dV_{rel}}{dt} = P_w V_w \frac{A}{V_0} \left( \frac{C_i^N + C_i^S(t)}{V_{rel}} - C_o^N - C_o^S \right) \quad (1)$$

$$23 \quad \frac{dC_i^S(t)}{dt} = -P_s \frac{A}{V_0} \left( \frac{C_i^S(t)}{V_{rel}} - C_o^S \right) \quad (2)$$

24 Where  $P_w$ ,  $P_s$ ,  $V_w$ ,  $V_0$ , and  $A$  are water permeability across the membrane, the permeability of  
25 cargo across the membrane, molar volume of water, initial EV volume, and surface area of vesicle,  
26 respectively.  $C_o^N$  and  $C_i^N$  are external and internal concentrations of nonpermeating solutes,  
27 respectively.  $C_o^S$  and  $C_i^S$  are external and internal concentrations of permeating solutes,  
28 respectively.

29 The simplified model, represented by equations 1 and 2, is based on the following key  
30 assumptions. These include a constant concentration in the external solution, consideration of  
31 only the concentration gradient across the EV membrane due to slower diffusion across the  
32 membrane, constant membrane thickness, and the direct proportionality of osmotic pressure to  
33 the concentration of the given substance.

34 The average EV radius, measured at 65.3 nm using DLS, served as the basis for the calculation of  
35  $V_0$  and  $A$ . Utilizing literature values for water permeability ( $P_w$ )<sup>1, 2</sup> at  $5.8 \times 10^{-5}$  m/s and Dox

36 permeability ( $P_S$ )<sup>3</sup> at  $5.0 \times 10^{-7}$  m/s across cell membranes and the list of parameters shown in  
37 **Table S1**, the vesicle volume and Dox concentration inside EV as a function of time were  
38 calculated as shown in **Figure S2**.

39         Increasing  $P_w$  led to a rapid vesicle volume and cargo concentration escalation, as  
40 illustrated in **Figure S2A**. Variations in vesicle size influenced cargo loading dynamics, with larger  
41 vesicles requiring more time, as depicted in **Figure S2B**. The permeability of Dox,  $P_S$ , range from  
42 0.1 to 25  $\mu\text{m}/\text{sec}$  according to previous reports.<sup>3, 4</sup> The changes in  $P_S$  showed minimal effects on  
43 volume and cargo concentration within vesicles, as demonstrated in **Figure S2C**. The osmolarity  
44 of a hypotonic solution significantly impacted both volume increase and cargo concentration.  
45 However, when the osmolarity of the hypotonic solution fell below 296  $\mu\text{Osm}/\text{L}$ , a plateau effect  
46 was observed, as shown in **Figure S2D**.

47         Based on the calculation using the conditions specified in **Table S1**, the theoretical cargo  
48 concentration inside the vesicle after 5 minutes is estimated to be 0.45 mM. This theoretical  
49 value may differ from the experimental result of 18.8 mM, derived by analyzing the Dox  
50 concentration in solutions collected from the top of the filter (representing total Dox  
51 concentration) and the flow-through samples (representing Dox concentration outside EVs).  
52 Several factors contribute to this variance. In the K-K equation, the concentration outside EVs is  
53 assumed to be constant over time. However, in real systems, osmolarity changes dynamically  
54 during filtration, creating a continual osmolarity difference between the interior and exterior of  
55 EVs. Additionally, the simulation assumes constant values for  $P_w$  and  $P_S$ , yet it is known that  
56 membrane permeability changes as vesicles undergo swelling.<sup>5-7</sup> This disparity between the  
57 assumptions of the simulation and the dynamic nature of the real system could be a contributing

58 factor to the observed differences in results.

59 **Table S1. Parameters used in equation (1) and (2)**

| Parameters   |                                  | References |
|--------------|----------------------------------|------------|
| $P_w$        | $5.80 \times 10^5$ m/s           | 1          |
| $V_w$        | 18 $\text{cm}^3/\text{mol}$      | 2          |
| $A$          | $5.35 \times 10^4$ $\text{nm}^2$ |            |
| $V_0$        | $1.16 \times 10^6$ $\text{nm}^3$ |            |
| $r$          | 65.3 nm                          |            |
| $P_s$ of Dox | $5 \times 10^{-7}$ m/s           | 3          |
| $C_o^S$      | $5 \times 10^{-6}$ M             |            |
| $C_i^N$      | 296 mOsm/L                       |            |
| $C_o^N$      | 0.296 mOsm/L                     |            |

60

61

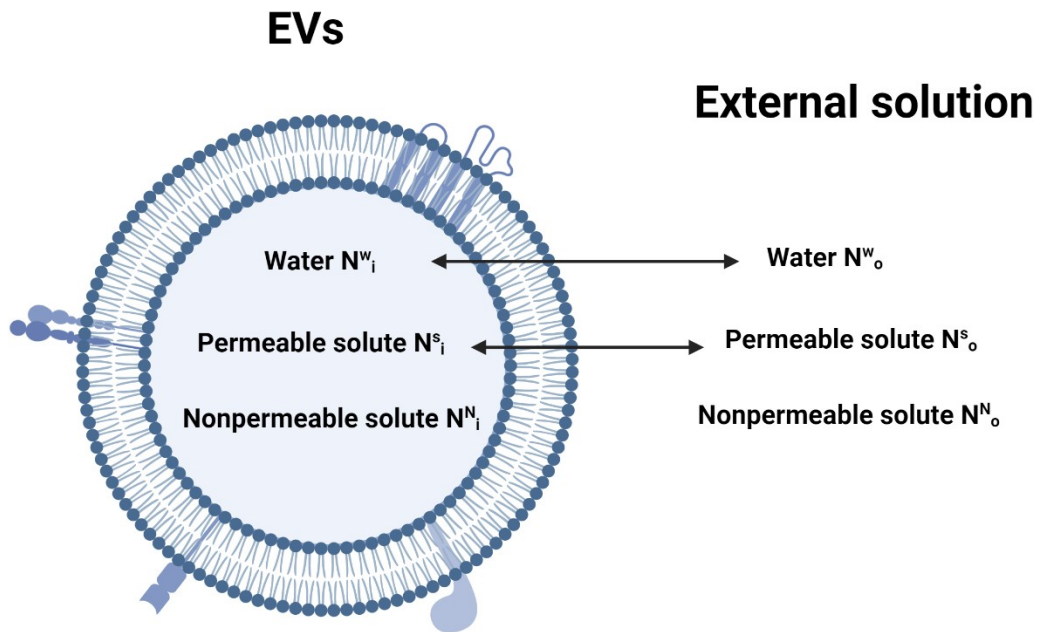

62

63 **Figure S1. Schematic representation of EVs under osmotic shock.** External solution contain  
 64 water (W), permeating solute (S), and non-permeating solute (N). Created by Biorender.

65

**A**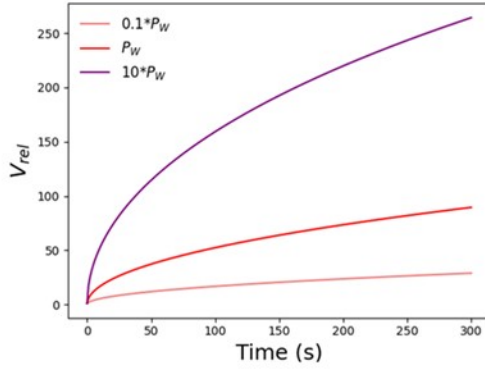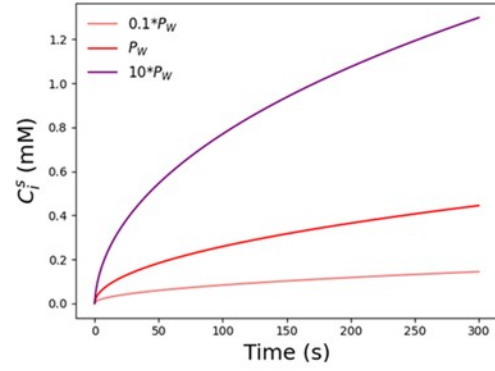**B**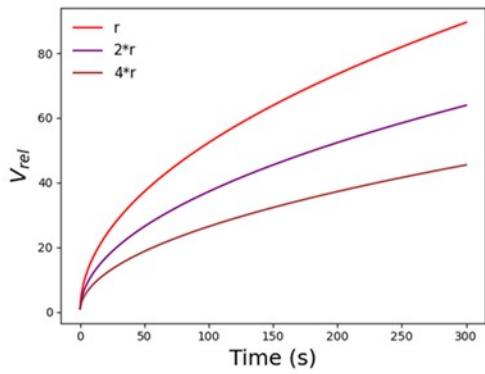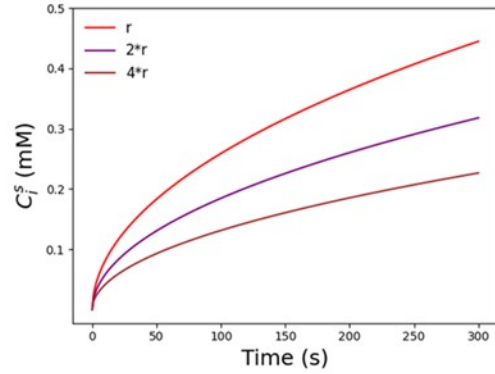**C**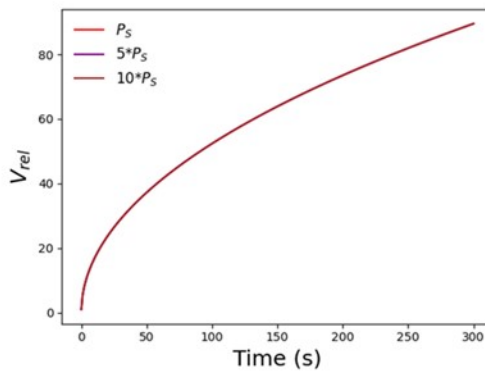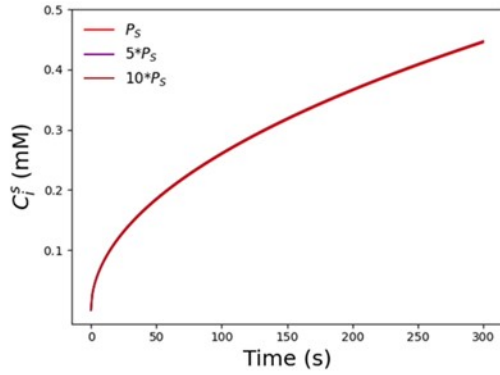**D**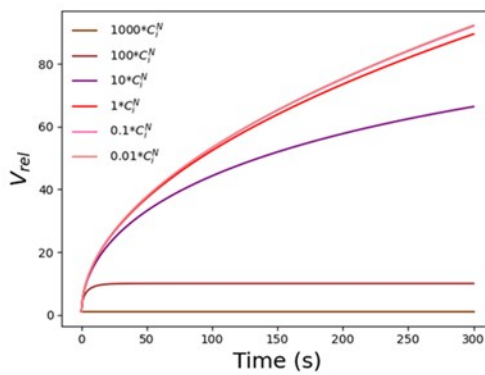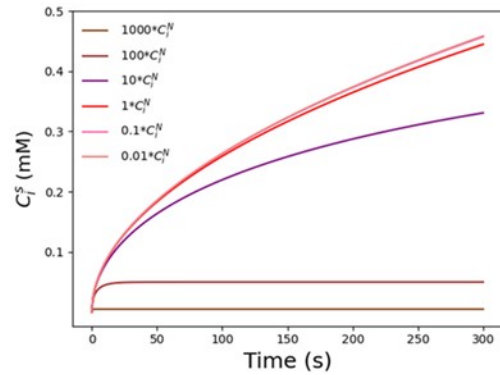

67 **Figure S2. Simulation outcomes depicting the relative volume increment (left) and cargo**  
68 **concentration within EVs (right) over time with varied** (A) water permeability across the  
69 membrane ( $P_w = 5.8 \times 10^5$  m/s), (B) radius of vesicle ( $r = 65.3$  nm), (C) permeability of cargo across  
70 the membrane ( $P_s = 5.0 \times 10^{-7}$  m/s), (D) the osmolarity of hypotonic solution outside EVs ( $C_o^N =$   
71  $0.296$  mOsm/L). The parameters are summarized in **Table S1**.

72

73

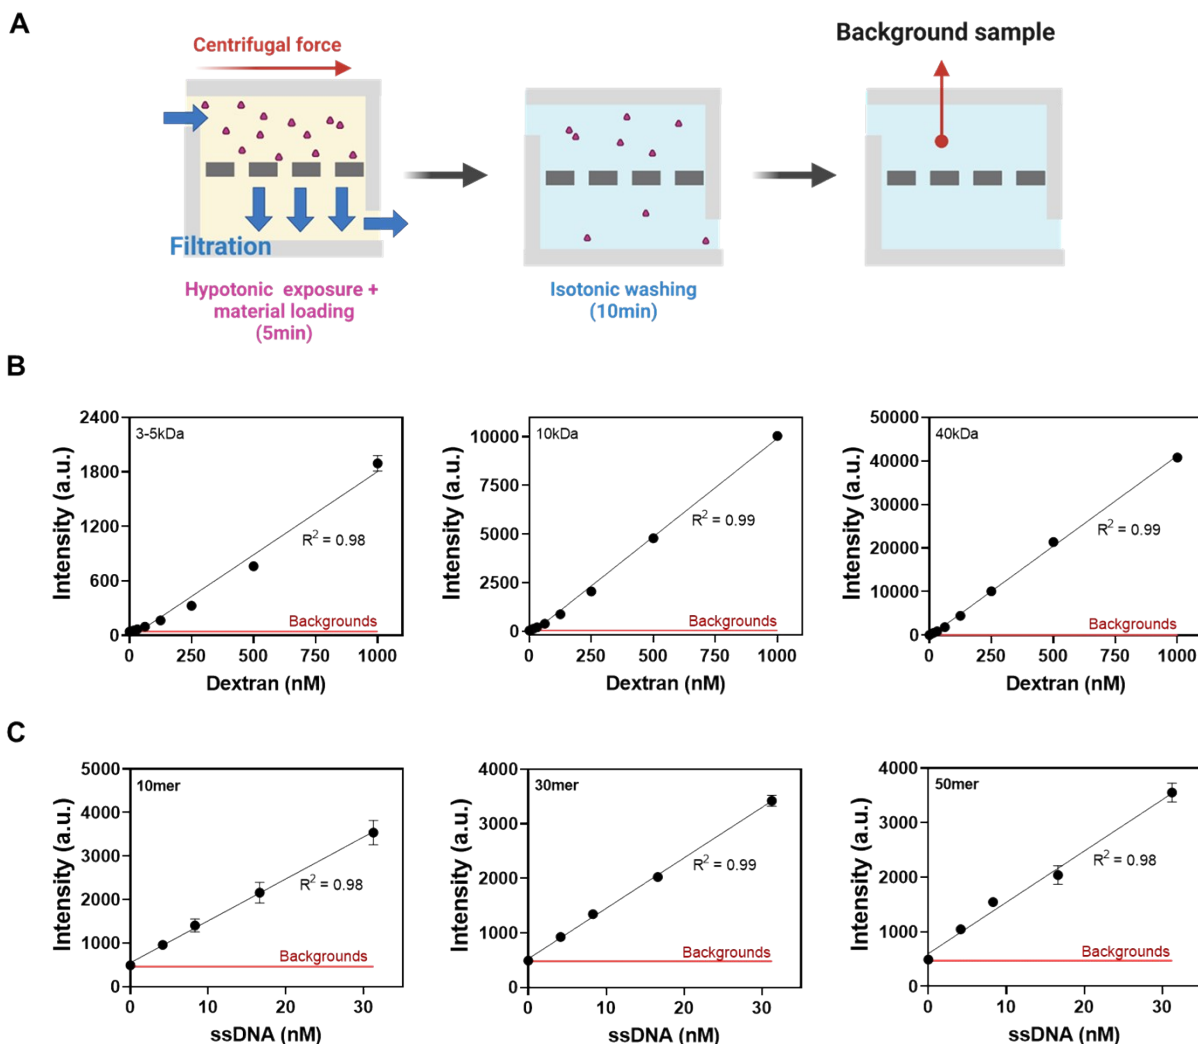

74

75 **Figure S3. To confirm the effective washing of free loading materials, the background signal is**  
 76 **compared with the calibration curve.** (A) Illustration of the preparation process of the  
 77 background sample. (B) Background signals of (i) 3-5 kDa, (ii) 10 kDa, and (iii) 40 kDa FITC-dextran  
 78 respectively, along with their corresponding calibration curves. (C) Background signals of (i) 10  
 79 mer, (ii) 30 mer, and (iii) 50 mer FAM labelled ssDNA respectively, along with their corresponding  
 80 calibration curves. Each point represents a triple replication, and in some cases, the error bars  
 81 are too small to be seen.



82

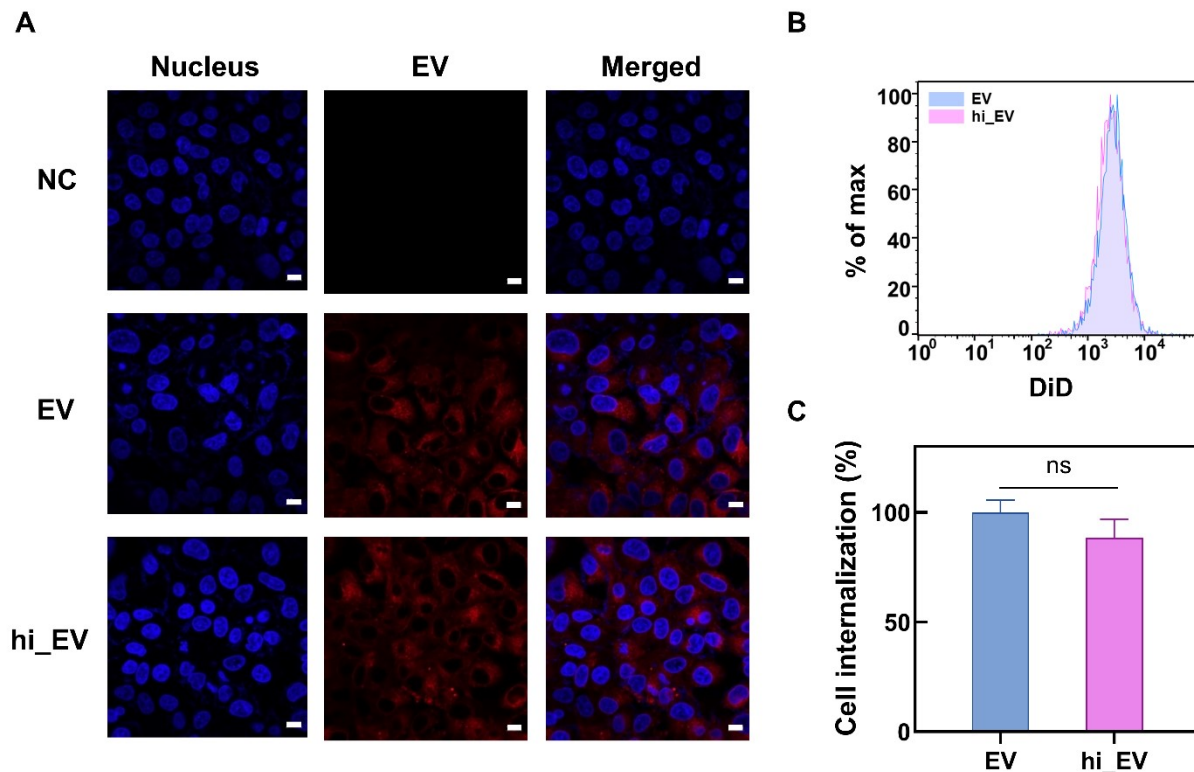

83

84 **Figure S4. TC method does not impair the cellular internalization of EVs** (A) Confocal microscopy  
85 images of the internalization of HEK293T EVs stained with DiD (red) into A549 cells, with the cell  
86 nucleus stained with Hoechst 33342 (blue) (NC; negative control, scale bar: 10  $\mu$ m). (B)  
87 Fluorescence-activated cell sorting (FACS) analysis represents the EV-treated cells' fluorescence  
88 intensity. (C) The efficiency of EV internalization into cells was calculated using the mean  
89 fluorescence intensity (MFI) determined by FACS (ns, not significant; \* $p > 0.05$ ). Data represent  
90 mean  $\pm$  s.d. of  $n = 3$  independent experiments.

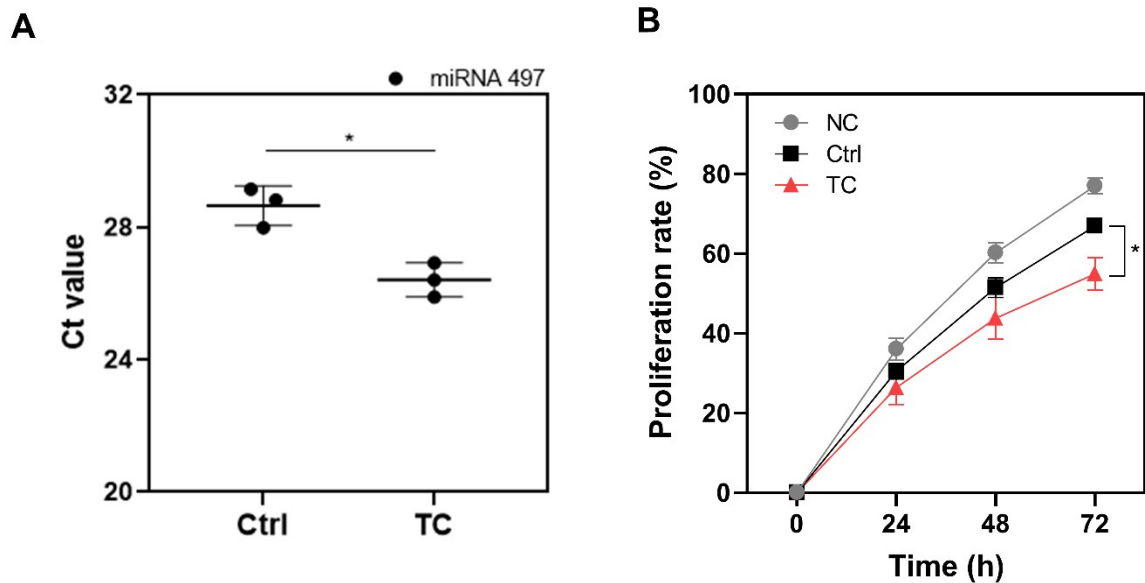

91

92 **Figure S5 Quantification results of the loading of miR-497 into EVs using the TC method, and**

93 **the results of proliferation test performed on A549 cells after treatment of miR-497 loaded EVs.**

94 (A) The Ct value measured by real-time PCR after loading miR-497 into EVs using the TC method

95 is compared with the control case (\* $p < 0.05$ ). (B) Proliferation rate is measured after treating

96 A549 cells with miR-497 loaded EVs (\* $p < 0.05$ ). The data represent the mean  $\pm$  s.d. of  $n = 3$

97 independent experiments.

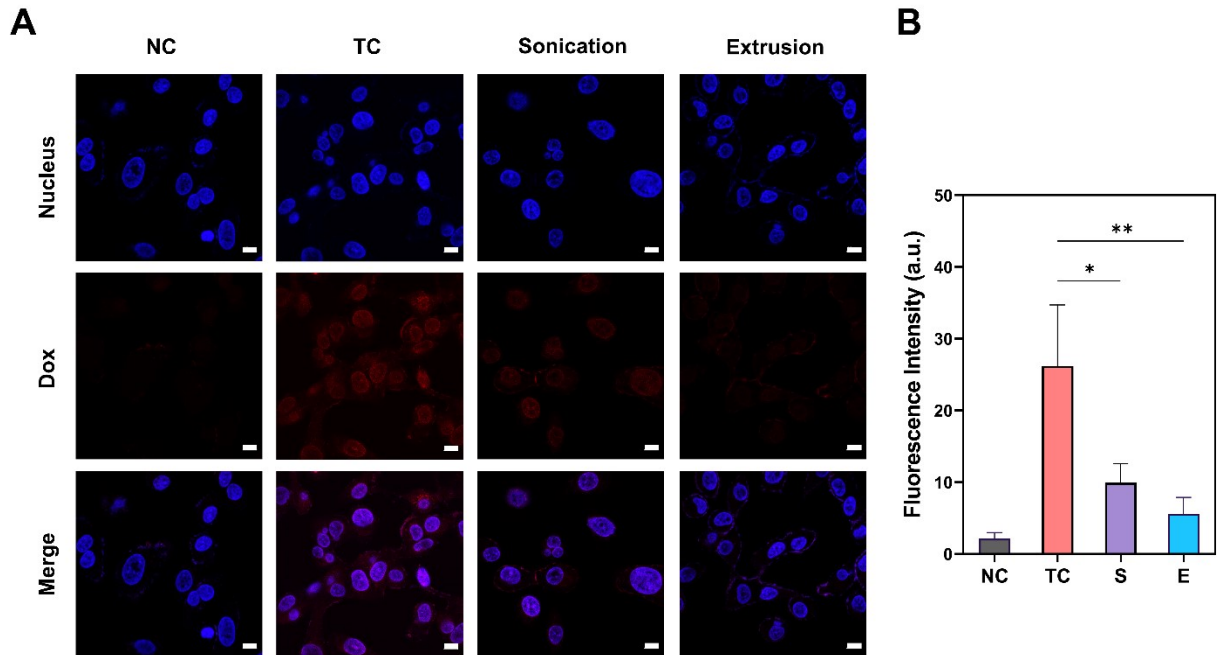

98

99 **Figure S6. Analysis of Dox-EV internalization in A549 cells depending on the loading methods**

100 (A) Representative images of A549 cells after treating with Dox-EVs. (Nucleus is stained blue and

101 Dox-EV is stained red, scale bar: 10  $\mu$ m) (B) Quantification of the mean fluorescence intensity

102 (MFI) of Dox. Data shown as mean  $\pm$  s.d. of n = 3 independent experiments (\*\* p < 0.01, \* p <

103 0.05).

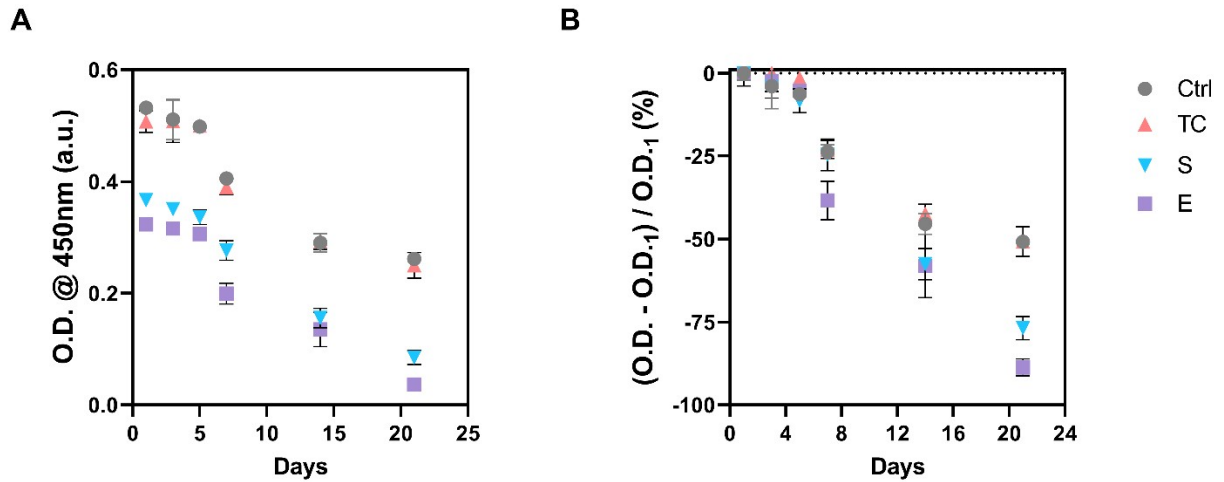

104

105 **Figure S7. Stability assessment of EVs after different loading procedures.** The stability of EVs  
 106 was evaluated using sandwich ELISA employing tetraspanin markers (CD81 as capture antibody  
 107 and CD9 as detection antibody). (A) EV stability was observed after distinct loading methods: TC  
 108 (tonicity control), S (sonication), and E (extrusion). (B) Percent decrease in signal normalized to  
 109 their day 1 values (O.D. ; optical density, O.D.1; optical density at day1) after each process. After  
 110 21 days of storage at 4°C, Ctrl and TC samples exhibited a signal decrease of  $51.0 \pm 1.7\%$  and  $53.0$   
 111  $\pm 4.3\%$ , respectively, compared to day 1. Sonication and extrusion showed a more pronounced  
 112 signal reduction of  $76.9 \pm 3.5\%$  and  $88.7 \pm 2.6\%$ , respectively.

A

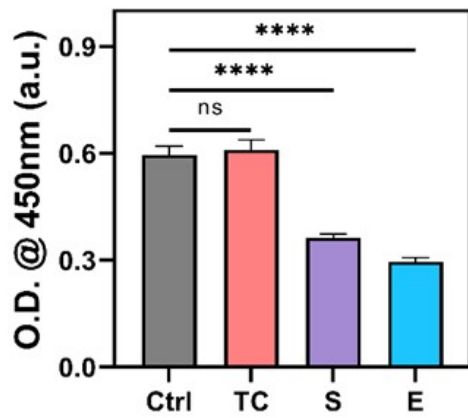

B

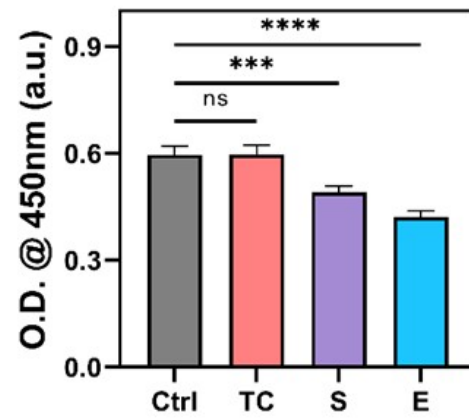

113

114 **Figure S8. Comparison of TC with other EV loading methods by using sandwich ELISA (capture**

115 **antibody: CD81 and detection antibody: CD9)** (TC, tonicity control; S, sonication; E, extrusion)

116 (A) CD81-CD9 ELISA results after each process when the same initial CCS volume was used. (B)

117 CD81-CD9 ELISA results using EV samples with the same particle concentration after various

118 loading processes. (\*\*\*\* $p < 0.0001$ ; \*\*\* $p < 0.001$ ; ns, not significant)

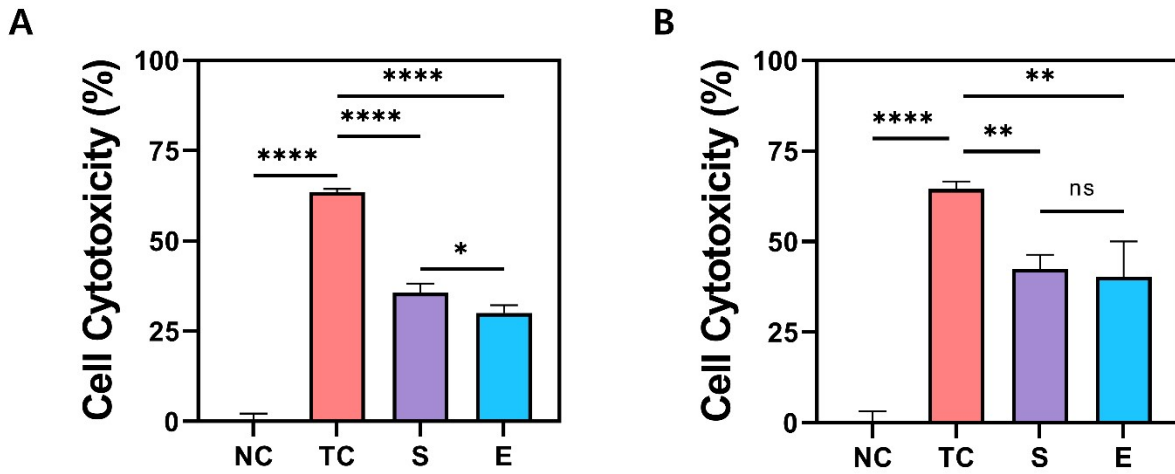

119 **Figure S9. A549 cell cytotoxicity after 48 hrs by treating Dox-EVs produced by different**  
 120 **processes** (A) Cell cytotoxicity after treating Dox-EVs obtained from the experiments using the  
 121 same initial volume of CCS. (B) Cell cytotoxicity after treating with equal particle concentrations  
 122 of EVs obtained from different loading processes. (\*\*\*\* $p < 0.0001$ , \*\* $p < 0.01$ ; ns, not  
 123 significant).

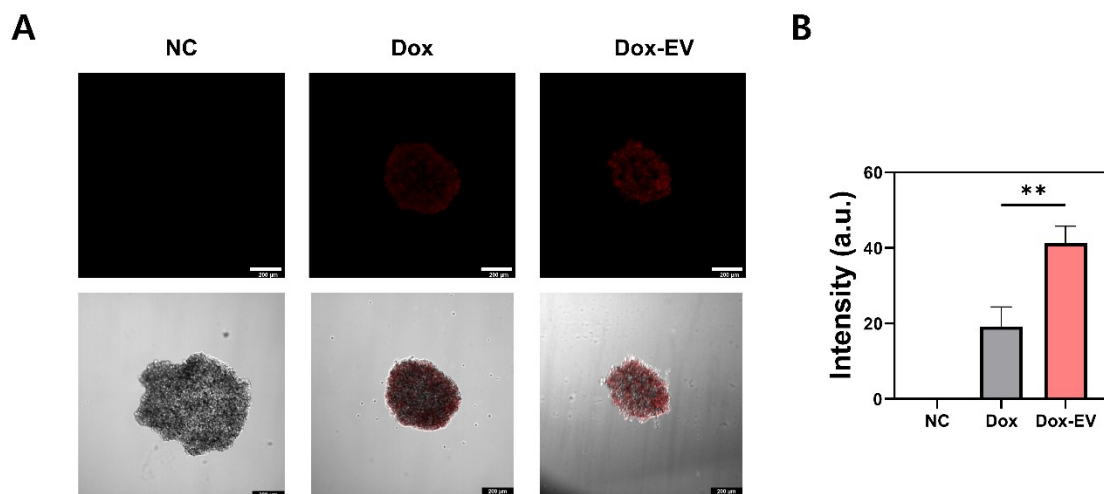

124

125 **Figure S10. Confocal imaging of A549 spheroids treated with Dox and Dox-EV produced by TC**

126 **methods** (Scale bar = 200  $\mu\text{m}$ ) Images were captured using a confocal microscope (THUNDER,

127 Leica) at 10X magnification. Dox-EV intensity within the spheroids was evaluated by generating

128 images using max intensity projection of Z-stack via the THUNDER imaging system. (A) Cellular

129 uptake and distribution of Dox and Dox-EVs after the treatment for 48 hrs. (B) Mean intensity of

130 Dox inside of the spheroid area. (\*\* $p < 0.01$ )

131

132 **References**

- 133 1. J. R. W. a. M. Elimelech\*, *Science Advances*, 2018, **4**, eaar8266.
- 134 2. H. Y. Elmoazzen, J. A. Elliott and L. E. McGann, *Biophys J*, 2009, **96**, 2559-2571.
- 135 3. G. Speelmans, R. W. Staffhorst, B. de Kruijff and F. A. de Wolf, *Biochemistry*, 1994, **33**,  
136 13761-13768.
- 137 4. Z. Aminipour, M. Khorshid, H. Keshvari, S. Bonakdar, P. Wagner and B. Van der Bruggen,  
138 *Eur J Pharm Biopharm*, 2020, **146**, 133-142.
- 139 5. S. U. Alam Shibly, C. Ghatak, M. A. Sayem Karal, M. Moniruzzaman and M. Yamazaki,  
140 *Biophys J*, 2016, **111**, 2190-2201.
- 141 6. D. Kumar, A. Gayen and M. Chandra, *ACS Infect Dis*, 2023, **9**, 2471-2481.
- 142 7. C.-M. Lin, D. T. Wu, H.-K. Tsao and Y.-J. Sheng, *Soft Matter*, 2012, **8**.
- 143
- 144
